# Supplementary material for: Development and validation of a 36-gene sequencing assay for hereditary cancer risk assessment
Source: PeerJ. 2017 Feb 23;5:e3046. doi: 10.7717/peerj.3046 (PMC5326550; doi:10.7717/peerj.3046)
Supplement: Table S2 [file peerj-05-3046-s002.xlsx]

## Sheet: Sheet1
Table S2: Pre- and post-sequencing quality metrics.
Category	Metric	Acceptable limit
Sample Quality	gDNA recovered from a specimen (PicoGreen dsDNA quantitation assay, Thermo Fisher Scientific)	>=18ng/ul
Sample Quality	gDNA fragment size	350-700bp
Sample Quality	PCR product concentration (by absorbance)	>=200ng/uL
Sample Quality	NTC product concentration (by absorbance)	<100ng/uL
Sequencing	Cluster density pass	Per manufacturer's specifications
Sequencing	Base quality > 30	>75% of bases
Sequencing	Base quality > 20	>90% of bases
Sequencing	Demux pass	No unexpected barcodes
Mapping	IQR of sample read depth normalized to known good sample	<0.34
Mapping	NTC mean coverage	<5 reads
Mapping	Sample mean coverage	>250 reads
Mapping	Fraction covered	1
Mapping	CV coverage	<0.75
Mapping	Contamination estimate	<5%
Mapping	Absolute GC content ( (GC% * reads/sum(reads))	43-50%
Mapping	Minimum number of reads at a called site	>=20; at least 10 must be alt alleles to call het
Variant calling	Z-score from Wilcoxon rank sum test of Alt vs. Ref read position bias	> -20
Variant calling	Phred-scaled confidence that the given genotype is true. Phred-scale (L(given genotype) / (L(ref) +L(het) + L(hom))	>30
Variant calling	Difference between observed allele balance and 1 (for homozygotes) or 0.5 (for heterozygotes)	<0.25
Variant calling	Normalized variant call confidence (GATK QD)	>3 (SNP) and >2(indel)
Variant calling	Phred-scaled likelihood of a non-ref allele existing at this position	>30
Variant calling	MinIndelFrac	>0.1
Variant calling	AB (difference between observed allele balance and 1 (for homozygotes) or 0.5 (for heterozygotes)	<0.25 (SNP only)
Variant calling	Strand Bias LOD	<0.25
Sample QC	Observed gender matches reported gender	Pass
gDNA = genomic DNA
dsDNA = double-stranded DNA
PCR = polymerase chain reaction
NTC = no template control
IQR = inter-quartile range
AB = allele balance deviance
LOD = log-odds
