# Supplementary material for: Development and validation of a 36-gene sequencing assay for hereditary cancer risk assessment
Source: PeerJ. 2017 Feb 23;5:e3046. doi: 10.7717/peerj.3046 (PMC5326550; doi:10.7717/peerj.3046)
Supplement: Table S3 [file peerj-05-3046-s003.xlsx]

## Sheet: accuracy
Table S3a: Summary of Coriell cell lines used for assessment of SNV and indel detection
Sample ID	Source	Sample Description
HG02851	Coriell	1000 Genomes Project
NA10080	Coriell	Cowden disease (PTEN c.781C>T)
NA16533	Coriell	Cutaneous melanoma (CDKN2A with a 19 bp del in ex2)
NA19314	Coriell	1000 Genomes Project
NA19475	Coriell	1000 Genomes Project
HG00651	Coriell	1000 Genomes Project
NA18876	Coriell	1000 Genomes Project
HG00379	Coriell	1000 Genomes Project
NA19452	Coriell	1000 Genomes Project
HG00306	Coriell	1000 Genomes Project
NA19309	Coriell	1000 Genomes Project
HG02334	Coriell	1000 Genomes Project
HG03432	Coriell	1000 Genomes Project
HG03563	Coriell	1000 Genomes Project
HG01204	Coriell	1000 Genomes Project
NA19428	Coriell	1000 Genomes Project
NA19390	Coriell	1000 Genomes Project
HG02108	Coriell	1000 Genomes Project
HG00271	Coriell	1000 Genomes Project
NA19020	Coriell	1000 Genomes Project
NA12889	Coriell	1000 Genomes Project
NA19834	Coriell	1000 Genomes Project
NA18502	Coriell	1000 Genomes Project
NA18505	Coriell	1000 Genomes Project
HG00327	Coriell	1000 Genomes Project
NA11995	Coriell	1000 Genomes Project
NA18942	Coriell	1000 Genomes Project
HG00464	Coriell	1000 Genomes Project
NA07048	Coriell	1000 Genomes Project
NA10847	Coriell	1000 Genomes Project
NA11829	Coriell	1000 Genomes Project
HG00650	Coriell	1000 Genomes Project
HG00128	Coriell	1000 Genomes Project
NA12005	Coriell	1000 Genomes Project
HG00182	Coriell	1000 Genomes Project
HG00255	Coriell	1000 Genomes Project
NA11831	Coriell	1000 Genomes Project
HG00641	Coriell	1000 Genomes Project
NA10851	Coriell	1000 Genomes Project
NA12872	Coriell	1000 Genomes Project
NA19129	Coriell	1000 Genomes Project
NA18526	Coriell	1000 Genomes Project
NA19700	Coriell	1000 Genomes Project
HG00580	Coriell	1000 Genomes Project
NA19735	Coriell	1000 Genomes Project
HG00608	Coriell	1000 Genomes Project
NA20502	Coriell	1000 Genomes Project
NA12750	Coriell	1000 Genomes Project
HG00260	Coriell	1000 Genomes Project
NA12004	Coriell	1000 Genomes Project
NA12003	Coriell	1000 Genomes Project
NA07357	Coriell	1000 Genomes Project
NA12155	Coriell	1000 Genomes Project
NA19648	Coriell	1000 Genomes Project
NA11994	Coriell	1000 Genomes Project
NA12043	Coriell	1000 Genomes Project
HG00663	Coriell	1000 Genomes Project
NA12044	Coriell	1000 Genomes Project
HG00732	Coriell	1000 Genomes Project
HG00171	Coriell	1000 Genomes Project
HG00266	Coriell	1000 Genomes Project
NA12874	Coriell	1000 Genomes Project
HG00136	Coriell	1000 Genomes Project
NA12716	Coriell	1000 Genomes Project
NA12873	Coriell	1000 Genomes Project
NA12144	Coriell	1000 Genomes Project
NA11830	Coriell	1000 Genomes Project
NA18555	Coriell	1000 Genomes Project
NA07056	Coriell	1000 Genomes Project
NA12763	Coriell	1000 Genomes Project
NA06994	Coriell	1000 Genomes Project
NA20509	Coriell	1000 Genomes Project
HG00554	Coriell	1000 Genomes Project
HG00692	Coriell	1000 Genomes Project
NA18956	Coriell	1000 Genomes Project
NA12813	Coriell	1000 Genomes Project
NA12814	Coriell	1000 Genomes Project
NA18940	Coriell	1000 Genomes Project
NA18947	Coriell	1000 Genomes Project
NA11881	Coriell	1000 Genomes Project
NA18507	Coriell	1000 Genomes Project
NA19670	Coriell	1000 Genomes Project
HG00731	Coriell	1000 Genomes Project
HG00274	Coriell	1000 Genomes Project
NA11832	Coriell	1000 Genomes Project
HG00251	Coriell	1000 Genomes Project
HG00280	Coriell	1000 Genomes Project
HG00309	Coriell	1000 Genomes Project
HG00637	Coriell	1000 Genomes Project
NA12761	Coriell	1000 Genomes Project
NA12878	Coriell	1000 Genomes Project
NA19703	Coriell	1000 Genomes Project
NA19704	Coriell	1000 Genomes Project
HG00101	Coriell	1000 Genomes Project
NA18517	Coriell	1000 Genomes Project
HG00436	Coriell	1000 Genomes Project
NA18508	Coriell	1000 Genomes Project
HG00119	Coriell	1000 Genomes Project
HG00110	Coriell	1000 Genomes Project
NA18501	Coriell	1000 Genomes Project
NA12006	Coriell	1000 Genomes Project
HG00150	Coriell	1000 Genomes Project
NA12812	Coriell	1000 Genomes Project

## Sheet: reproducibility
Table S3b: Summary of Coriell cell lines used for assessment of intra- and inter-run reproducibility.
Sample ID	Source	Sample Description	Measure
NA12878	Coriell	Genome in a Bottle	SNV/indel call reproducibility
NA24143	Coriell	Genome in a Bottle	SNV/indel call reproducibility
NA24149	Coriell	Genome in a Bottle	SNV/indel call reproducibility
NA24385	Coriell	Genome in a Bottle	SNV/indel call reproducibility
NA24631	Coriell	Genome in a Bottle	SNV/indel call reproducibility
NA24694	Coriell	Genome in a Bottle	SNV/indel call reproducibility
NA24695	Coriell	Genome in a Bottle	SNV/indel call reproducibility
NA14626	Coriell	Breast Cancer Information Core (BIC)	CNV call reproducibility
