# Supplementary material for: Development and validation of a 36-gene sequencing assay for hereditary cancer risk assessment
Source: PeerJ. 2017 Feb 23;5:e3046. doi: 10.7717/peerj.3046 (PMC5326550; doi:10.7717/peerj.3046)
Supplement: Table S4 [file peerj-05-3046-s004.xlsx]

## Sheet: SNVs_indels
Table S4a: Examples of SNV/indel-positive samples in validation.
Sample ID	Source	Gene	Variant Type	HGVS and Literature Name	Sanger (by external lab)
NIBSC1	NIBSC	MLH1	SNV	NM_000249.3(MLH1):c.350C>T (p.Thr117Met)	Confirmed (NIBSC)
NIBSC1	NIBSC	MLH1	SNV	NM_000249.3(MLH1):c.1852A>G;c.1853A>C](p.Lys618Ala)	Confirmed (NIBSC)
NIBSC2	NIBSC	MSH2	SNV	NM_000251.2(MSH2) c.942+3A>T (IVS5+3A>T)	Confirmed (NIBSC)
Counsyl_1	Counsyl lab	SDHB	INDEL	NM_003000.2(SDHB):c.424-19_424-14del6	Confirmed
Counsyl_2	Counsyl lab	SDHB	INDEL	NM_003000.2(SDHB):c.424-19_424-14dup6	Confirmed
Counsyl_3	Counsyl lab	SDHB	INDEL	NM_003000.2(SDHB):c.424-19_424-14del6	Confirmed
Counsyl_4	Counsyl lab	SDHB	INDEL	NM_003000.2(SDHB):c.424-19_424-14dup6	Confirmed
Counsyl_5	Counsyl lab	SDHB	INDEL	NM_003000.2(SDHB):c.424-19_424-14del6	Confirmed
Counsyl_6	Counsyl lab	SDHB	INDEL	NM_003000.2(SDHB):c.424-19_424-14dup6	Confirmed
Counsyl_7	Counsyl lab	SDHB	INDEL	NM_003000.2(SDHB):c.424-19_424-14dup6	Confirmed
Counsyl_8	Counsyl lab	SDHB	INDEL	NM_003000.2(SDHB):c.424-19_424-14del6	Confirmed
Counsyl_9	Counsyl lab	SDHB	INDEL	NM_003000.2(SDHB):c.424-19_424-14dup6	Confirmed
Counsyl_10	Counsyl lab	SDHB	INDEL	NM_003000.2(SDHB):c.424-19_424-14dup6	Confirmed
Counsyl_11	Counsyl lab	SDHB	INDEL	NM_003000.2(SDHB):c.424-19_424-14dup6	Confirmed
Counsyl_12	Counsyl lab	MUTYH	INDEL	NM_001048171.1(MUTYH):c.484_493del10 (p.G162Tfs*16)	Confirmed
Counsyl_13	Counsyl lab	RET	INDEL	NM_020975.4(RET):c.2136+15_2136+35del21	Confirmed
Counsyl_14	Counsyl lab	PTEN	INDEL	NC_000010.10(PTEN):g.89623139_89623164del26	Confirmed
Counsyl_15	Counsyl lab	PTEN	INDEL	NC_000010.10(PTEN):g.89623139_89623164del26	Confirmed
Counsyl_16	Counsyl lab	PTEN	INDEL	NM_000314.4(PTEN):c.210-7_210-3del5	Confirmed
Counsyl_17	Counsyl lab	PTEN	INDEL	NM_000314.4(PTEN):c.210-7_210-3del5	Confirmed
Counsyl_18	Counsyl lab	PTEN	INDEL	NM_000314.4(PTEN):c.210-7_210-3del5	Confirmed
Counsyl_19	Counsyl lab	PTEN	INDEL	NM_000314.4(PTEN):c.210-7_210-3del5	Confirmed
Counsyl_20	Counsyl lab	PTEN	INDEL	NM_000314.4(PTEN):c.210-7_210-3del5	Confirmed
Counsyl_21	Counsyl lab	PTEN	INDEL	NM_000314.4(PTEN):c.210-7_210-3del5	Confirmed
Counsyl_22	Counsyl lab	PTEN	INDEL	NM_000314.4(PTEN):c.210-7_210-3del5	Confirmed
Counsyl_23	Counsyl lab	ATM	INDEL	NM_000051.3(ATM):c.2639-382_2639-377del6	Confirmed
Counsyl_24	Counsyl lab	ATM	ALU INS	NM_000051.3(ATM):c.8010+13_8010+14insAlu	Confirmed
Counsyl_25	Counsyl lab	ATM	ALU INS	NM_000051.3(ATM):c.8010+13_8010+14insAlu	Confirmed
Counsyl_26	Counsyl lab	ATM	ALU INS	NM_000051.3(ATM):c.8010+13_8010+14insAlu	Confirmed
Counsyl_27	Counsyl lab	BRCA2	ALU INS	NM_000059.3(BRCA2):c.156_157insAlu	Confirmed
Counsyl_28	Counsyl lab	BRCA2	ALU INS	NM_000059.3(BRCA2):c.156_157insAlu	Confirmed
Counsyl_85	Counsyl lab	BRCA2	ALU INS	NM_000059.3(BRCA2):c.930_931insAlu	Confirmed
Counsyl_29	Counsyl lab	BRCA2	INDEL	NM_000059.3(BRCA2):c.771_775del5 (p.N257Kfs*17)	Confirmed
Counsyl_30	Counsyl lab	BRCA2	INDEL	NM_000059.3(BRCA2):c.4405_4409del5 (p.D1469Kfs*11)	Confirmed
Counsyl_31	Counsyl lab	BRCA2	INDEL	NM_000059.3(BRCA2):c.4446_4451dup6 (p.E1482_T1483dup)	Confirmed
Counsyl_32	Counsyl lab	BRCA2	INDEL	NM_000059.3(BRCA2):c.5218_5223del6 (p.L1740_S1741del)	Confirmed
Counsyl_33	Counsyl lab	BRCA2	INDEL	NM_000059.3(BRCA2):c.5218_5223del6 (p.L1740_S1741del)	Confirmed
Counsyl_34	Counsyl lab	BRCA2	INDEL	NM_000059.3(BRCA2):c.6938-16_6938-12del5	Confirmed
Counsyl_35	Counsyl lab	BRCA2	INDEL	NM_000059.3(BRCA2):c.8122_8133dup12 (p.T2708_A2711dup)	Confirmed
Counsyl_36	Counsyl lab	BRCA2	INDEL	NM_000059.3(BRCA2):c.8331+8_8331+12del5	Confirmed
Counsyl_37	Counsyl lab	BRCA2	INDEL	NM_000059.3(BRCA2):c.8736_8744del9 (p.D2913_A2915del)	Confirmed
Counsyl_38	Counsyl lab	BRCA2	INDEL	NM_000059.3(BRCA2):c.9052_9057del6 (p.K3019_S3020del)	Confirmed
Counsyl_39	Counsyl lab	BRCA2	INDEL	NM_000059.3(BRCA2):c.10095del1ins11 (p.S3366Nfs*4)	Confirmed
Counsyl_40	Counsyl lab	BRCA2	INDEL	NM_000059.3(BRCA2):c.10095del1ins11 (p.S3366Nfs*4)	Confirmed
Counsyl_41	Counsyl lab	BRCA2	INDEL	NM_000059.3(BRCA2):c.10095del1ins11 (p.S3366Nfs*4)	Confirmed
Counsyl_43	Counsyl lab	PALB2	INDEL	NM_024675.3(PALB2):c.3396_3405del10 (p.T1133Qfs*27)	Confirmed
Counsyl_44	Counsyl lab	PALB2	INDEL	NM_024675.3(PALB2):c.1350_1355del6(p.N452_L453del)	Confirmed
Counsyl_45	Counsyl lab	PALB2	INDEL	NM_024675.3(PALB2):c.964_975dup12 (p.E322_I325dup)	Confirmed
Counsyl_47	Counsyl lab	BRCA1	INDEL	NM_007294.3(BRCA1):c.3700_3704del5 (p.V1234Qfs*8)	Confirmed
Counsyl_48	Counsyl lab	BRCA1	INDEL	NM_007294.3(BRCA1):c.3481_3491del11 (p.E1161Ffs*3)	Confirmed
Counsyl_49	Counsyl lab	BRCA1	INDEL	NM_007294.3(BRCA1):c.1175_1214del40 (p.L392Qfs*5)	Confirmed
Counsyl_50	Counsyl lab	BRCA1	INDEL	NM_007294.3(BRCA1):c.1175_1214del40 (p.L392Qfs*5)	Confirmed
Counsyl_51	Counsyl lab	STK11	INDEL	NM_000455.4(STK11):c.735-6_735-2del5	Confirmed
Counsyl_52	Counsyl lab	MSH2	INDEL	NM_000251.2(MSH2):c.2210+11_2210+22del12	Confirmed
Counsyl_53	Counsyl lab	MSH6	INDEL	NM_000179.2(MSH6):c.-9_-2dup8	Confirmed
Counsyl_54	Counsyl lab	MSH6	INDEL	NM_000179.2(MSH6):c.3215_3222del8 (p.G1072Vfs*18)	Confirmed
Counsyl_55	Counsyl lab	MSH6	INDEL	NM_000179.2(MSH6):c.3438+14_3438+20del7	Confirmed
Counsyl_56	Counsyl lab	MSH6	INDEL	NM_000179.2(MSH6):c.4001+11_4001+35del25	Confirmed
Counsyl_57	Counsyl lab	MSH6	INDEL	NM_000179.2(MSH6):c.4001+4_4001+8dup5	Confirmed
Counsyl_58	Counsyl lab	MSH6	INDEL	NM_000179.2(MSH6):c.4001+11_4001+15dup5	Confirmed
Counsyl_59	Counsyl lab	MSH6	INDEL	NM_000179.2(MSH6):c.4001+11_4001+15dup5	Confirmed
Counsyl_60	Counsyl lab	MSH6	INDEL	NM_000179.2(MSH6):c.4001+11_4001+15dup5	Confirmed
Counsyl_61	Counsyl lab	MSH6	INDEL	NM_000179.2(MSH6):c.4002-11_4002-1dup11	Confirmed
Counsyl_62	Counsyl lab	MSH6	INDEL	NM_000179.2(MSH6):c.*24_*28del5	Confirmed
Counsyl_63	Counsyl lab	MSH6	INDEL	NM_000179.2(MSH6):c.*24_*28del5	Confirmed
Counsyl_64	Counsyl lab	MSH6	INDEL	NM_000179.2(MSH6):c.*24_*28del5	Confirmed
Counsyl_65	Counsyl lab	MSH6	INDEL	NM_000179.2(MSH6):c.*24_*28del5	Confirmed
Counsyl_66	Counsyl lab	CHEK2	INDEL	NM_007194.3(CHEK2):c.246_260del15(p.D82_E86del)	Confirmed
Counsyl_67	Counsyl lab	VHL	INDEL	NM_000551.3(VHL):c.-12_2dup14	Confirmed
Counsyl_68	Counsyl lab	MLH1	INDEL	NM_000249.3(MLH1):c.71_75del5(p.V24Afs*5)	Confirmed
Counsyl_69	Counsyl lab	MLH1	INDEL	NM_000249.3(MLH1):c.209_221del13 (p.K70Ifs*18)	Confirmed
Counsyl_70	Counsyl lab	APC	INDEL	NM_000038.5(APC):c.2607_2608del2ins11 (p.P870delinsFFKA)	Confirmed
Counsyl_71	Counsyl lab	APC	INDEL	NM_000038.5(APC):c.3013_3019del7 (p.A1005Kfs*15)	Confirmed
Counsyl_72	Counsyl lab	APC	INDEL	NM_000038.5(APC):c.3927_3931delAAAGA(p.E1309Dfs*4)	Confirmed
Counsyl_73	Counsyl lab	APC	INDEL	NM_000038.5(APC):c.3927_3931delAAAGA(p.E1309Dfs*4)	Confirmed
Counsyl_74	Counsyl lab	APC	INDEL	NM_000038.5(APC):c.5501_5506del6(p.V1834_R1835del)	Confirmed
Counsyl_75	Counsyl lab	SDHA	INDEL	NM_004168.2(SDHA):c.770+19_770+23del5	Confirmed
Counsyl_76	Counsyl lab	SDHA	INDEL	NM_004168.2(SDHA):c.770+19_770+23del5	Confirmed
Counsyl_77	Counsyl lab	SDHA	INDEL	NM_004168.2(SDHA):c.770+19_770+23del5	Confirmed
Counsyl_78	Counsyl lab	SDHA	INDEL	NM_004168.2(SDHA):c.770+19_770+23del5	Confirmed
Counsyl_79	Counsyl lab	SDHA	INDEL	NM_004168.2(SDHA):c.770+19_770+23del5	Confirmed
Counsyl_80	Counsyl lab	SDHA	INDEL	NM_004168.2(SDHA):c.770+19_770+23del5	Confirmed
Counsyl_81	Counsyl lab	SDHA	INDEL	NM_004168.2(SDHA):c.770+19_770+23del5	Confirmed
Counsyl_82	Counsyl lab	PMS2	INDEL	NM_000535.5(PMS2):c.741_742ins10(p.S248Vfs*5)	Confirmed
Counsyl_83	Counsyl lab	PMS2	INDEL	NM_000535.5(PMS2):c.736_741del6ins11 (p.P246Cfs*3)	Confirmed
Counsyl_84	Counsyl lab	MSH6	ALU INS	NM_000179(MSH6):c.458-19_458-18insAlu	Confirmed
Notes.
NIBSC, the National Institute for Biological Standards and Control.

## Sheet: CNVs
Table S4b: Examples of CNV-positive samples in validation.
Sample ID	Source	Gene	Variant Type	HGVS and/or Literature Name	Orthogonal Confirmation
NIBSC3	NIBSC	MSH2	CNV	NM_000251.2(MSH2):c.(?_-285)_(1076+3243_?)del (del exon 1-6)	NIBSC data
NIBSC4	NIBSC	MSH2	CNV	NM_000251.2(MSH2):c.(?_1077-132)_(1276+117_?)del (del exon 7)	NIBSC data
NIBSC5	NIBSC	MSH2	CNV	NM_000251.2(MSH2):c.(?_-285)_(367-409_?)del (del exon 1-2)	NIBSC data
NIBSC6	NIBSC	MSH2	CNV	NM_000251.2(MSH2):c.(?_-285)_(211+241_?)del (del exon 1)	NIBSC data
NIBSC7	NIBSC	MLH1	CNV	NM_000249.3(MLH1):c.(?_1409+1060)_(1558+4311_?)dup (dup exon 13)	NIBSC data
Counsyl_101	Counsyl lab	SDHB	CNV	NM_003000.2(SDHB):c.(?_766-369)_(*362_?)del (del exon 8)	Confirmed by MLPA
Counsyl_102	Counsyl lab	MUTYH	CNV	NM_001048171.1(MUTYH):c.(?_-379)_(*380_?)dup (dup exon 1-16)	Confirmed by MLPA
Counsyl_103	Counsyl lab	RET	CNV	NM_020975.4(RET):c.(?_74-227)_(*136_?)dup (dup exon 2-20)	Confirmed by MLPA
Counsyl_104	Counsyl lab	ATM	CNV	NM_000051.3(ATM):c.(?_2467-62)_(*225_?)del (del exon 17-63)	Confirmed by MLPA
Counsyl_105	Counsyl lab	ATM	CNV	NM_000051.3(ATM) :c.(?_8851-101)_(*225_?)dup (dup exon 62-63)	Confirmed by MLPA
Counsyl_106	Counsyl lab	ATM	CNV	NM_000051.3(ATM) :c.(?_8851-101)_(*225_?)dup (dup exon 62-63)	Confirmed by MLPA
Counsyl_107	Counsyl lab	ATM	CNV	NM_000051.3(ATM) :c.(?_8851-101)_(*225_?)dup (dup exon 62-63)	Confirmed by MLPA
Counsyl_108	Counsyl lab	BRCA2	CNV	NM_000059.3(BRCA2):c.(?_-127)_(67+95_?)del (del exon 1-2)	Confirmed by MLPA
Counsyl_109	Counsyl lab	BRCA2	CNV	NM_000059.3(BRCA2):c.(?_68-73)_(316+109_?)del (del exon 3)	Confirmed by MLPA
Counsyl_110	Counsyl lab	PALB2	CNV	NM_024675.3(PALB2):c.(?_3351-99)_(*61_?)del (del exon 13)	Confirmed by MLPA
Counsyl_111	Counsyl lab	PALB2	CNV	NM_024675.3(PALB2):c.(?_3351-99)_(*61_?)del (del exon 13)	Confirmed by MLPA
Counsyl_112	Counsyl lab	PALB2	CNV	NM_024675.3(PALB2) : c.(?_3114-106)_(*61_?)del (del exon 11-13)	Confirmed by MLPA
Counsyl_113	Counsyl lab	PALB2	CNV	NM_024675.3(PALB2):c.(?_2587-61)_(*61_?)del (del exon 7-13)	Confirmed by MLPA
Counsyl_114	Counsyl lab	PALB2	CNV	NM_024675.3(PALB2):c.(?_2587-61)_(*61_?)del (del exon 7-13)	Confirmed by MLPA
Counsyl_115	Counsyl lab	BRCA1	CNV	NM_007294.3(BRCA1):c.(?_5468-64)_(*1383_?)dup (dup exon 23)	Confirmed by MLPA
Counsyl_116	Counsyl lab	BRCA1	CNV	NM_007294.3(BRCA1):c.(?_-179)_(*1383_?)dup (dup exon 1-23)	Confirmed by MLPA
Counsyl_117	Counsyl lab	BRCA1	CNV	NM_007294.3(BRCA1):c.(?_-179)_(*1383_?)del (del exon 1-23)	Confirmed by MLPA
Counsyl_118	Counsyl lab	BRCA1	CNV	NM_007294.3(BRCA1):c.(?_-179)_(*1383_?)del (del exon 1-23)	Confirmed by MLPA
Counsyl_119	Counsyl lab	BRCA1	CNV	NM_007294.3(BRCA1):c.(?_-179)_(*1383_?)del (del exon 1-23)	Confirmed by MLPA
Counsyl_120	Counsyl lab	BRCA1	CNV	NM_007294.3(BRCA1):c.(?_-179)_(5406+109_?)dup (dup exon 1-21)	Confirmed by MLPA
Counsyl_121	Counsyl lab	BRCA1	CNV	NM_007294.3(BRCA1):c.(?_4676-370)_(5074+410_?)del (del exon 15-16)	Confirmed by MLPA
Counsyl_122	Counsyl lab	BRCA1	CNV	NM_007294.3(BRCA1):c.(?_-179)_(5074+410_?)del (del exon 1-16)	Confirmed by MLPA
Counsyl_123	Counsyl lab	BRCA1	CNV	NM_007294.3(BRCA1):c.(?_4358-2663)_(4484+223_?)del (del exon 13)	Confirmed by MLPA
Counsyl_124	Counsyl lab	BRCA1	CNV	NM_007294.3(BRCA1):c.(?_4186-405)_(4358-2475_?)dup (dup exon 12)	Confirmed by MLPA
Counsyl_125	Counsyl lab	BRCA1	CNV	NM_007294.3(BRCA1):c.(?_-19)_(80+1_?)del (del exon 1-2)	Confirmed by MLPA
Counsyl_127	Counsyl lab	STK11	CNV	NM_000455.4(STK11):c.(?_-70)_(290+121_?)dup (dup exon 1)	Confirmed by MLPA
Counsyl_128	Counsyl lab	EPCAM	CNV	NM_002354.2(EPCAM):c.(?_859-48)_(*248_?)dup (dup exon 8-9)	Confirmed by MLPA
Counsyl_128	Counsyl lab	MSH2	CNV	NM_000251.2(MSH2):c.(?_-285)_(*216_?)dup (dup exon 1-16)	Confirmed by MLPA
Counsyl_129	Counsyl lab	MSH2	CNV	NM_000251.2(MSH2):c.(?_-285)_(645+67_?)del (del exon 1-3)	Confirmed by MLPA
Counsyl_130	Counsyl lab	MSH2	CNV	NM_000251.2(MSH2):c.(?_-285)_(1076+631_?)del (del exon 1-6)	Confirmed by MLPA
Counsyl_131	Counsyl lab	MSH2	CNV	NM_000251.2(MSH2):c.(?_-285)_(1076+631_?)del (del exon 1-6)	Confirmed by MLPA
Counsyl_132	Counsyl lab	MSH2	CNV	NM_000251.2(MSH2):c.(?_-285)_(1076+3243_?)del (del exon 1-6)	Confirmed by MLPA
Counsyl_133	Counsyl lab	MSH2	CNV	NM_000251.2(MSH2):c.(?_-285)_(1076+3243_?)del (del exon 1-6)	Confirmed by MLPA
Counsyl_134	Counsyl lab	MSH2	CNV	NM_000251.2(MSH2):c.(?_-285)_(1076+3243_?)dup (dup exon 1-6)	Confirmed by MLPA
Counsyl_136	Counsyl lab	MSH2	CNV	NM_000251.2(MSH2):c.(?_793-125)_(1076+631_?)del (del exon 5-6)	Confirmed by MLPA
Counsyl_137	Counsyl lab	MSH2	CNV	NM_000251.2(MSH2):c.(?_943-67)_(1076+3243_?)del (del exon 6)	Confirmed by MLPA
Counsyl_139	Counsyl lab	MSH2	CNV	NM_000251.2(MSH2):c.(?_1387-398)_(1661+186_?)del (del exon 9-10)	Confirmed by MLPA
Counsyl_140	Counsyl lab	CHEK2	CNV	NM_007194.3(CHEK2):c.(?_593-359)_(*58_?)del (del exon 5-15)	Confirmed by MLPA
Counsyl_141	Counsyl lab	CHEK2	CNV	NM_007194.3(CHEK2):c.(?_319+4207)_(*58_?)dup (dup exon 3-15)	Confirmed by MLPA
Counsyl_142	Counsyl lab	VHL	CNV	NM_000551.3(VHL):c.(?_-144)_(*77_?)dup (dup exon 1-3)	Confirmed by MLPA
Counsyl_145	Counsyl lab	MLH1	CNV	NM_000249.3(MLH1):c.(?_208-68)_(*3016_?)del (del exon 3-19)	Confirmed by MLPA
Counsyl_146	Counsyl lab	MLH1	CNV	NM_000249.3(MLH1):c.(?_1732-84)_(*260_?)dup (dup exon 16-19)	Confirmed by MLPA
Counsyl_147	Counsyl lab	APC	CNV	NM_000038.5(APC): NM_000038.5(APC):c.(?_4153)_(4660_?)del (part del exon 16)	Confirmed by Sanger
Counsyl_149	Counsyl lab	PMS2	CNV	NM_000535.5(PMS2):c.(?_904-255)_(1144+349_?)del (del exon 9-10)	Confirmed by MLPA
Counsyl_150	Counsyl lab	PMS2	CNV	NM_000535.5(PMS2):c.(?_-2625)_(1144+349_?)dup (dup exon 1-10)	Confirmed by MLPA
