# Supplementary material for: Development and validation of a 36-gene sequencing assay for hereditary cancer risk assessment
Source: PeerJ. 2017 Feb 23;5:e3046. doi: 10.7717/peerj.3046 (PMC5326550; doi:10.7717/peerj.3046)
Supplement: Table S8 [file peerj-05-3046-s008.xlsx]

## Sheet: Sheet1
Table S8: Potentially deleterious "no-call" sites.
Sample	Gene	chrom:start-end (hg19)	1000 Genomes Call	Reason for Counsyl No-Call*
HG00171	PTEN	chr10:89,720,673-89,720,673	T/T	AB;QD
HG00251	ATM	chr11:108,122,744-108,122,744	T/T	QUAL;AB;QD
HG00280	APC	chr5:112,111,323-112,111,323	T/T	AB;QD
HG00436	SDHA	chr5:236,581-236,581	C/C	AB;QD
HG00512	PTEN	chr10:89,720,653-89,720,653	C/C	QUAL;AB;QD
HG00637	BARD1	chr2:215,657,178-215,657,178	T/T	QUAL;AB;QD
HG00651	MSH2	chr2:47,641,562-47,641,562	A/A	AB
HG03432	SDHA	chr5:236,616-236,619	CGGT/CGGT	manual override to no call
HG03563	PTEN	chr10:89,720,738-89,720,738	G/G	QUAL;AB;QD
NA11994	TP53	chr17:7,577,120-7,577,120	C/T**	AB
NA12005	PTEN	chr10:89,720,653-89,720,653	C/C	AB;QD
NA19309	PTEN	chr10:89,720,653-89,720,653	C/C	QUAL;AB;QD
NA19390	POLE	chr12:133,263,893-133,263,893	C/C	AB;QD
NA19475	BARD1	chr2:215,645,309-215,645,309	G/G	AB
NA19834	SDHA	chr5:236,616-236,619	CGGT/CGGT	manual override to no call
Table contains all no calls made for potentially deleterious (known deleterious, predicted deleterious, and uncurated) variants in the 1000 Genomes samples tested.
* See Table S2 for details on metrics and cutoffs. AB = allele balance, QUAL = GATK quality score, QD = GATK quality by depth
** For this sample, exome data from the 1000 Genomes Project showed support for the T SNP in 24% of reads, and our data showed support for the T SNP in 23% of reads.
